# Supplementary material
Source: PubMed Central journal article supplement (PMC7964273)
Supplement: 14-01375.pdf [file 14-01375.pdf]

**On-line Table 1: Basic demographic and outcome variables**

|                                                                  | Group A            |                    | Group B           |                    | Group C             |                   | Group D            |                     | C vs D              |                     | tPA Status          |                     | Overall Group Effect |  |
|------------------------------------------------------------------|--------------------|--------------------|-------------------|--------------------|---------------------|-------------------|--------------------|---------------------|---------------------|---------------------|---------------------|---------------------|----------------------|--|
|                                                                  | Recan-, CS-        | Recan+, CS+        | Recan-, CS-       | Recan+, CS+        | P Value             | Recan+, CS-       | Recan+, CS+        | P Value              |  |
| <b>Demographic variables</b>                                     |                    |                    |                   |                    |                     |                   |                    |                     |                     |                     |                     |                     |                      |  |
| Age (yr) (mean)                                                  | 71.9 ± 13.9        | 70.0 ± 15.2        | 77.6 ± 14.4       | 72.5 ± 13.5        | .4085               | 77.6 ± 14.4       | 72.5 ± 13.5        | .0835               | .934                | .0753               | .934                | .0753               |                      |  |
| Sex (Female) (No) (%)                                            | 24 (42.1)          | 67 (56.8)          | 13 (50.0)         | 94 (48.5)          | .0667               | 13 (50.0)         | 94 (48.5)          | .9347               | .0223 <sup>b</sup>  | .3297               | .0223 <sup>b</sup>  | .3297               |                      |  |
| CBS >6 (No) (%)                                                  | 11 (19.3)          | 55 (46.6)          | 6 (23.1)          | 109 (56.2)         | .0006 <sup>b</sup>  | 6 (23.1)          | 109 (56.2)         | .1087               | .0041 <sup>b</sup>  | <.0001 <sup>b</sup> | .0041 <sup>b</sup>  | <.0001 <sup>b</sup> |                      |  |
| Proximal clot location (No) (%)                                  | 39 (68.4)          | 58 (49.2)          | 10 (38.5)         | 63 (32.5)          | .0166               | 10 (38.5)         | 63 (32.5)          | .2618               | .0944               | <.0001 <sup>b</sup> | .0944               | <.0001 <sup>b</sup> |                      |  |
| Time to scan (min) (median) (interquartile range) <sup>a</sup>   | 107.5 (80.5–147.5) | 106.0 (83.0–157.0) | 94.0 (73.0–139.5) | 107.0 (80.0–147.0) | .5709               | 94.0 (73.0–139.5) | 107.0 (80.0–147.0) | .1491               | <.0001 <sup>b</sup> | .4878               | <.0001 <sup>b</sup> | .4878               |                      |  |
| Mean blood pressure (mm Hg) (mean)                               | 133.2 ± 27.3       | 128.5 ± 25.2       | 124.4 ± 32.9      | 130.0 ± 29.4       | .2936               | 124.4 ± 32.9      | 130.0 ± 29.4       | .3746               | .297                | .5572               | .297                | .5572               |                      |  |
| Hyperglycemia (No) (%)                                           | 10 (17.5)          | 32 (27.1)          | 6 (23.1)          | 35 (18.0)          | .1681               | 6 (23.1)          | 35 (18.0)          | .7632               | .3271               | .2038               | .3271               | .2038               |                      |  |
| Hypertension (No) (%)                                            | 38 (66.7)          | 75 (63.6)          | 19 (73.1)         | 125 (64.4)         | .6886               | 19 (73.1)         | 125 (64.4)         | .4037               | .5588               | .8192               | .5588               | .8192               |                      |  |
| Diabetes (No) (%)                                                | 8 (14.0)           | 27 (22.9)          | 5 (19.2)          | 30 (15.5)          | .1746               | 5 (19.2)          | 30 (15.5)          | .7861               | .2083               | .2692               | .2083               | .2692               |                      |  |
| High cholesterol (No) (%)                                        | 19 (33.3)          | 46 (39.0)          | 8 (30.8)          | 80 (41.2)          | .47                 | 8 (30.8)          | 80 (41.2)          | .4807               | .5694               | .6379               | .5694               | .6379               |                      |  |
| CAD (No) (%)                                                     | 10 (17.5)          | 26 (22.0)          | 4 (15.4)          | 47 (24.2)          | .4933               | 4 (15.4)          | 47 (24.2)          | .4923               | .3899               | .6664               | .3899               | .6664               |                      |  |
| Smoking (No) (%)                                                 | 11 (19.3)          | 23 (19.5)          | 4 (15.4)          | 28 (14.4)          | .9769               | 4 (15.4)          | 28 (14.4)          | .775                | .7253               | .6177               | .7253               | .6177               |                      |  |
| GM: core volume (cm <sup>3</sup> ) (mean) <sup>a</sup>           | 13.6 ± 11.1        | 5 ± 6.1            | 10.9 ± 7.5        | 4.3 ± 5.1          | <.0001 <sup>b</sup> | 10.9 ± 7.5        | 4.3 ± 5.1          | <.0001 <sup>b</sup> | .0747               | <.0001 <sup>b</sup> | <.0001 <sup>b</sup> | <.0001 <sup>b</sup> |                      |  |
| WM: core volume (cm <sup>3</sup> ) (mean) <sup>a</sup>           | 8.4 ± 8.2          | 2.8 ± 4.1          | 7.2 ± 6.1         | 2.6 ± 3.7          | <.0001 <sup>b</sup> | 7.2 ± 6.1         | 2.6 ± 3.7          | <.0001 <sup>b</sup> | .0521               | <.0001 <sup>b</sup> | <.0001 <sup>b</sup> | <.0001 <sup>b</sup> |                      |  |
| GM: penumbra volume (cm <sup>3</sup> ) (mean) <sup>a</sup>       | 11.6 ± 6.2         | 5.7 ± 5.2          | 8.5 ± 4           | 4.6 ± 4.4          | <.0001 <sup>b</sup> | 8.5 ± 4           | 4.6 ± 4.4          | <.0001 <sup>b</sup> | .1678               | <.0001 <sup>b</sup> | <.0001 <sup>b</sup> | <.0001 <sup>b</sup> |                      |  |
| WM: penumbra volume (cm <sup>3</sup> ) (mean) <sup>a</sup>       | 7.1 ± 4.8          | 3 ± 3.3            | 5.1 ± 2.5         | 2.4 ± 2.4          | <.0001 <sup>b</sup> | 5.1 ± 2.5         | 2.4 ± 2.4          | <.0001 <sup>b</sup> | .1312               | <.0001 <sup>b</sup> | <.0001 <sup>b</sup> | <.0001 <sup>b</sup> |                      |  |
| GM: benign volume (cm <sup>3</sup> ) (mean) <sup>a</sup>         | 16.2 ± 6.3         | 10 ± 7.2           | 12.6 ± 5.7        | 8.4 ± 6.6          | <.0001 <sup>b</sup> | 12.6 ± 5.7        | 8.4 ± 6.6          | .0016 <sup>b</sup>  | .1129               | <.0001 <sup>b</sup> | .1129               | <.0001 <sup>b</sup> |                      |  |
| WM: benign volume (cm <sup>3</sup> ) (mean) <sup>a</sup>         | 9.7 ± 5.1          | 4.9 ± 4.3          | 7.2 ± 3.3         | 4 ± 3.7            | <.0001 <sup>b</sup> | 7.2 ± 3.3         | 4 ± 3.7            | <.0001 <sup>b</sup> | .1626               | <.0001 <sup>b</sup> | .1626               | <.0001 <sup>b</sup> |                      |  |
| GM: total ischemic volume (cm <sup>3</sup> ) (mean) <sup>a</sup> | 41.4 ± 20.3        | 20.7 ± 16.5        | 32 ± 14.4         | 17.4 ± 14.1        | <.0001 <sup>b</sup> | 32 ± 14.4         | 17.4 ± 14.1        | <.0001 <sup>b</sup> | .1611               | <.0001 <sup>b</sup> | .1611               | <.0001 <sup>b</sup> |                      |  |
| WM: total ischemic volume (cm <sup>3</sup> ) (mean) <sup>a</sup> | 25.2 ± 15.8        | 10.7 ± 10.5        | 19.5 ± 10         | 9 ± 8.5            | <.0001 <sup>b</sup> | 19.5 ± 10         | 9 ± 8.5            | <.0001 <sup>b</sup> | .1323               | <.0001 <sup>b</sup> | .1323               | <.0001 <sup>b</sup> |                      |  |
| <b>Outcome variables</b>                                         |                    |                    |                   |                    |                     |                   |                    |                     |                     |                     |                     |                     |                      |  |
| Baseline NIHSS (median) (interquartile range) <sup>a</sup>       | 20 (17–23)         | 13 (8–18)          | 18 (16–23)        | 11 (6–17)          | <.0001 <sup>b</sup> | 18 (16–23)        | 11 (6–17)          | <.0001 <sup>b</sup> |                      |  |
| mRS score (median) (interquartile range)                         | 5 (4–6)            | 4 (2–5)            | 5 (2–6)           | 2 (1–4)            | .0002 <sup>b</sup>  | 5 (2–6)           | 2 (1–4)            | <.0001 <sup>b</sup> | .6194               | <.0001 <sup>b</sup> | .6194               | <.0001 <sup>b</sup> |                      |  |
| Good outcome (No.) (%)                                           | 3 (5.4)            | 35 (29.9)          | 7 (26.9)          | 99 (52.1)          | .0012 <sup>b</sup>  | 7 (26.9)          | 99 (52.1)          | .6722               | .0455               | <.0001 <sup>b</sup> | .0455               | <.0001 <sup>b</sup> |                      |  |
| Hemorrhagic transformation (No.) (%)                             | 31 (54.4)          | 50 (42.4)          | 17 (65.4)         | 76 (39.2)          | .1328               | 17 (65.4)         | 76 (39.2)          | .0524               | .0664               | .0178               | .0664               | .0178               |                      |  |
| Final infarct size volume cm <sup>3</sup> (mean) <sup>a</sup>    | 184.8 ± 135.2      | 97.7 ± 104.1       | 108.5 ± 98.2      | 42.1 ± 74.4        | .0006 <sup>b</sup>  | 108.5 ± 98.2      | 42.1 ± 74.4        | .0001 <sup>b</sup>  | .0093 <sup>b</sup>  | <.0001 <sup>b</sup> | .0093 <sup>b</sup>  | <.0001 <sup>b</sup> |                      |  |

**Note:**—CAD indicates coronary artery disease; Recan+, recanalization-positive; Recan-, recanalization-negative.

<sup>a</sup> Bonferroni adjusted P value < .0125 considered statistical significant.

<sup>b</sup> P value is significant.

**On-line Table 2: Univariate analysis for outcomes and variables<sup>a</sup>**

| Outcome and Clinical Variables     | Recan-             |                     |                         |                     |                         | Recan+             |                     |                         |                     |                         |                   |  |
|------------------------------------|--------------------|---------------------|-------------------------|---------------------|-------------------------|--------------------|---------------------|-------------------------|---------------------|-------------------------|-------------------|--|
|                                    | tPA vs Non-tPA     | Collateral          |                         |                     | Clinical Variable       |                    | tPA vs Non-tPA      | Collateral              |                     |                         | Clinical Variable |  |
|                                    |                    | Pos. vs Neg.        |                         | Coefficient (SE)    | P Value                 | Coefficient (SE)   |                     | Pos. vs Neg.            |                     | Clinical Variable       |                   |  |
|                                    |                    | P Value             | P Value                 |                     |                         |                    |                     | P Value                 | P Value             | OR (95% CI)             | OR (95% CI)       |  |
| <b>Baseline NIHSS</b>              |                    |                     |                         |                     |                         |                    |                     |                         |                     |                         |                   |  |
| Age (yr)                           | .0075 <sup>c</sup> | .0001 <sup>c</sup>  | -0.526 (0.093)          | .0305 <sup>c</sup>  | 0.007 (0.003)           | .0002 <sup>c</sup> | <.0001 <sup>c</sup> | -0.600 (0.145)          | .0476 <sup>c</sup>  | 0.007 (0.003)           |                   |  |
| Sex (I = F, 0 = M)                 | .0071 <sup>c</sup> | <.0001 <sup>c</sup> | -0.531 (0.095)          | .8784               | -0.014 (0.090)          | .0002 <sup>c</sup> | <.0001 <sup>c</sup> | -0.640 (0.145)          | .2692               | 0.102 (0.092)           |                   |  |
| CBS >6 (I = Y, 0 = N)              | .0208 <sup>c</sup> | <.0001 <sup>c</sup> | -0.445 (0.094)          | .0006 <sup>c</sup>  | -0.327 (0.093)          | .0022 <sup>c</sup> | .0005 <sup>c</sup>  | -0.503 (0.142)          | <.0001 <sup>c</sup> | -0.402 (0.090)          |                   |  |
| Clot location (proximal vs distal) | .0107 <sup>c</sup> | <.0001 <sup>c</sup> | -0.495 (0.094)          | .0292 <sup>c</sup>  | 0.198 (0.090)           | .0005 <sup>c</sup> | <.0001 <sup>c</sup> | -0.629 (0.145)          | .0822               | 0.169 (0.097)           |                   |  |
| Time to scan (min) <sup>b</sup>    | .014 <sup>c</sup>  | <.0001 <sup>c</sup> | -0.525 (0.095)          | .5531               | -0.047 (0.080)          | .0037 <sup>c</sup> | <.0001 <sup>c</sup> | -0.667 (0.145)          | .0261 <sup>c</sup>  | -0.189 (0.084)          |                   |  |
| Mean blood pressure (mm Hg)        | .0069 <sup>c</sup> | <.0001 <sup>c</sup> | -0.534 (0.094)          | .8996               | -0.000 (0.002)          | .0003 <sup>c</sup> | <.0001 <sup>c</sup> | -0.641 (0.145)          | .7061               | -0.001 (0.002)          |                   |  |
| Hyperglycemia (I = Y, 0 = N)       | .0063 <sup>c</sup> | <.0001 <sup>c</sup> | -0.529 (0.095)          | .6699               | -0.045 (0.106)          | .0002 <sup>c</sup> | <.0001 <sup>c</sup> | -0.630 (0.145)          | .235                | 0.139 (0.117)           |                   |  |
| Hypertension (I = Y, 0 = N)        | .0068 <sup>c</sup> | <.0001 <sup>c</sup> | -0.533 (0.094)          | .4733               | 0.068 (0.094)           | .0002 <sup>c</sup> | <.0001 <sup>c</sup> | -0.632 (0.146)          | .5257               | 0.062 (0.097)           |                   |  |
| Diabetes (I = Y, 0 = N)            | .0064 <sup>c</sup> | <.0001 <sup>c</sup> | -0.540 (0.094)          | .4006               | 0.096 (0.114)           | .0003 <sup>c</sup> | <.0001 <sup>c</sup> | -0.639 (0.146)          | .9011               | 0.016 (0.125)           |                   |  |
| High cholesterol (I = Y, 0 = N)    | .0083 <sup>c</sup> | <.0001 <sup>c</sup> | -0.547 (0.093)          | .0149 <sup>c</sup>  | 0.223 (0.091)           | .0003 <sup>c</sup> | <.0001 <sup>c</sup> | -0.643 (0.146)          | .6512               | 0.042 (0.093)           |                   |  |
| CAD (I = Y, 0 = N)                 | .0068 <sup>c</sup> | <.0001 <sup>c</sup> | -0.532 (0.094)          | .8277               | -0.024 (0.109)          | .0003 <sup>c</sup> | <.0001 <sup>c</sup> | -0.647 (0.145)          | .3367               | 0.103 (0.107)           |                   |  |
| Smoking (I = Y, 0 = N)             | .0072 <sup>c</sup> | <.0001 <sup>c</sup> | -0.534 (0.094)          | .7577               | -0.035 (0.114)          | .0001 <sup>c</sup> | <.0001 <sup>c</sup> | -0.647 (0.144)          | .0578               | -0.243 (0.127)          |                   |  |
| Total ischemic volume <sup>b</sup> | .0208 <sup>c</sup> | .0059 <sup>c</sup>  | -0.277 (0.099)          | <.0001 <sup>c</sup> | 0.241 (0.042)           | .0007 <sup>c</sup> | .0008 <sup>c</sup>  | -0.519 (0.153)          | .0015 <sup>c</sup>  | 0.107 (0.033)           |                   |  |
|                                    | <b>P Value</b>     | <b>P Value</b>      | <b>OR (95% CI)</b>      | <b>P Value</b>      | <b>OR (95% CI)</b>      | <b>P Value</b>     | <b>P Value</b>      | <b>OR (95% CI)</b>      | <b>P Value</b>      | <b>OR (95% CI)</b>      |                   |  |
| <b>Hemorrhagic transformation</b>  |                    |                     |                         |                     |                         |                    |                     |                         |                     |                         |                   |  |
| Age (yr)                           | .1379              | .1779               | 0.64 (0.34-1.22)        | .3068               | 1.01 (0.99-1.03)        | .2268              | .0069 <sup>c</sup>  | 0.30 (0.12-0.70)        | .1833               | 0.99 (0.97-1.01)        |                   |  |
| Sex (I = F, 0 = M)                 | .1283              | .1359               | 0.61 (0.32-1.17)        | .4695               | 1.25 (0.68-2.33)        | .277               | .0104 <sup>c</sup>  | 0.32 (0.13-0.75)        | .4641               | 0.81 (0.47-1.41)        |                   |  |
| CBS >6 (I = Y, 0 = N)              | .2373              | .4326               | 0.77 (0.39-1.50)        | .0284 <sup>c</sup>  | 0.48 (0.24-0.92)        | .2786              | .0203 <sup>c</sup>  | 0.35 (0.14-0.83)        | .3918               | 0.78 (0.45-1.37)        |                   |  |
| Clot location (proximal vs distal) | .162               | .286                | 0.70 (0.36-1.35)        | .09                 | 1.72 (0.92-3.21)        | .3152              | .0129 <sup>c</sup>  | 0.33 (0.13-0.77)        | .0301 <sup>c</sup>  | 1.90 (1.07-3.41)        |                   |  |
| Time to scan (min) <sup>b</sup>    | .084               | .191                | 0.65 (0.34-1.24)        | .4385               | 1.24 (0.72-2.15)        | .2028              | .0089 <sup>c</sup>  | 0.29 (0.12-0.72)        | .7687               | 1.08 (0.64-1.82)        |                   |  |
| Mean blood pressure (mm Hg)        | .1411              | .1663               | 0.63 (0.33-1.21)        | .8993               | 1.00 (0.99-1.01)        | .2202              | .0108 <sup>c</sup>  | 0.32 (0.13-0.75)        | .8219               | 1.00 (0.99-1.01)        |                   |  |
| Hyperglycemia (I = Y, 0 = N)       | .1441              | .1617               | 0.63 (0.33-1.20)        | .9425               | 1.03 (0.50-2.10)        | .1939              | .012 <sup>c</sup>   | 0.33 (0.13-0.76)        | .0225 <sup>c</sup>  | 2.27 (1.13-4.64)        |                   |  |
| Hypertension (I = Y, 0 = N)        | .136               | .1648               | 0.63 (0.33-1.20)        | .5089               | 1.37 (0.65-2.92)        | .2531              | .0067 <sup>c</sup>  | 0.29 (0.12-0.70)        | .0167 <sup>c</sup>  | 0.49 (0.28-0.88)        |                   |  |
| Diabetes (I = Y, 0 = N)            | .135               | .1362               | 0.61 (0.32-1.16)        | .3368               | 1.45 (0.68-3.15)        | .1853              | .0093 <sup>c</sup>  | 0.31 (0.13-0.73)        | .3546               | 0.70 (0.32-1.48)        |                   |  |
| High cholesterol (I = Y, 0 = N)    | .1523              | .1407               | 0.62 (0.32-1.17)        | .1952               | 1.52 (0.81-2.86)        | .2119              | .0139 <sup>c</sup>  | 0.33 (0.13-0.78)        | .0609               | 0.58 (0.33-1.02)        |                   |  |
| CAD (I = Y, 0 = N)                 | .1474              | .1481               | 0.62 (0.32-1.18)        | .4086               | 1.37 (0.65-2.92)        | .2387              | .0089 <sup>c</sup>  | 0.31 (0.12-0.73)        | .3561               | 1.35 (0.71-2.57)        |                   |  |
| Smoking (I = Y, 0 = N)             | .149               | .1595               | 0.63 (0.33-1.20)        | .372                | 0.70 (0.31-1.52)        | .1801              | .0092 <sup>c</sup>  | 0.31 (0.13-0.73)        | .1336               | 0.53 (0.22-1.18)        |                   |  |
| Total ischemic volume <sup>b</sup> | .2094              | .8345               | 0.92 (0.44-1.94)        | .009 <sup>c</sup>   | 1.62 (1.15-2.38)        | .241               | .0583               | 0.41 (0.16-1.01)        | .3966               | 1.10 (0.89-1.37)        |                   |  |
|                                    | <b>P Value</b>     | <b>P Value</b>      | <b>OR (95% CI)</b>      | <b>P Value</b>      | <b>OR (95% CI)</b>      | <b>P Value</b>     | <b>P Value</b>      | <b>OR (95% CI)</b>      | <b>P Value</b>      | <b>OR (95% CI)</b>      |                   |  |
| <b>Poor outcome (mRS &gt;2)</b>    |                    |                     |                         |                     |                         |                    |                     |                         |                     |                         |                   |  |
| Age (yr)                           | .184               | .0015 <sup>c</sup>  | 0.13 (0.03-0.40)        | .0041 <sup>c</sup>  | 1.04 (1.01-1.07)        | .1471              | .0434 <sup>c</sup>  | 0.36 (0.13-0.931)       | <.0001 <sup>c</sup> | 1.05 (1.03-1.075)       |                   |  |
| Sex (I = F, 0 = M)                 | .1603              | .0009 <sup>c</sup>  | 0.12 (0.03-0.37)        | .5446               | 1.27 (0.59-2.75)        | .1253              | .0138 <sup>c</sup>  | 0.31 (0.12-0.757)       | .2924               | 1.35 (0.78-2.349)       |                   |  |
| CBS >6 (I = Y, 0 = N)              | .4443              | .0062 <sup>c</sup>  | 0.17 (0.04-0.53)        | .0042 <sup>c</sup>  | 0.31 (0.13-0.68)        | .2458              | .0392 <sup>c</sup>  | 0.37 (0.13-0.917)       | .0884               | 0.61 (0.35-1.075)       |                   |  |
| Clot location (proximal vs distal) | .2907              | .0031 <sup>c</sup>  | 0.15 (0.04-0.46)        | .0034 <sup>c</sup>  | 3.38 (1.52-7.87)        | .2509              | .0184 <sup>c</sup>  | 0.33 (0.12-0.796)       | .0275 <sup>c</sup>  | 1.95 (1.08-3.57)        |                   |  |
| Time to scan (min) <sup>b</sup>    | .2738              | .0013 <sup>c</sup>  | 0.13 (0.03-0.39)        | .526                | 0.81 (0.43-1.54)        | .3089              | .0176 <sup>c</sup>  | 0.30 (0.10-0.772)       | .215                | 0.72 (0.42-1.201)       |                   |  |
| Mean blood pressure (mm Hg)        | .1732              | .0011 <sup>c</sup>  | 0.13 (0.03-0.38)        | .9872               | 1.00 (0.98-1.01)        | .1716              | .0136 <sup>c</sup>  | 0.31 (0.12-0.754)       | .6825               | 1.00 (0.99-1.011)       |                   |  |
| Hyperglycemia (I = Y, 0 = N)       | .1713              | .0012 <sup>c</sup>  | 0.13 (0.03-0.39)        | .8989               | 0.94 (0.40-2.34)        | .1407              | .0163 <sup>c</sup>  | 0.32 (0.12-0.779)       | .052                | 2.06 (1.01-4.353)       |                   |  |
| Hypertension (I = Y, 0 = N)        | .1661              | .0012 <sup>c</sup>  | 0.13 (0.03-0.38)        | .0677               | 2.06 (0.95-4.52)        | .1563              | .0158 <sup>c</sup>  | 0.32 (0.12-0.774)       | .3944               | 1.28 (0.72-2.292)       |                   |  |
| Diabetes (I = Y, 0 = N)            | .1947              | .0008 <sup>c</sup>  | 0.12 (0.03-0.36)        | .1446               | 2.20 (0.81-7.06)        | .1622              | .0141 <sup>c</sup>  | 0.31 (0.12-0.759)       | .8477               | 0.93 (0.44-1.963)       |                   |  |
| High cholesterol (I = Y, 0 = N)    | .2301              | .0009 <sup>c</sup>  | 0.12 (0.03-0.37)        | .084                | 2.09 (0.93-5.01)        | .1685              | .0113 <sup>c</sup>  | 0.30 (0.11-0.730)       | .1794               | 1.47 (0.84-2.579)       |                   |  |
| CAD (I = Y, 0 = N)                 | .172               | .0011 <sup>c</sup>  | 0.13 (0.03-0.38)        | .8382               | 1.10 (0.45-2.92)        | .1716              | .0134 <sup>c</sup>  | 0.31 (0.11-0.753)       | .6478               | 1.16 (0.61-2.213)       |                   |  |
| Smoking (I = Y, 0 = N)             | .1693              | .0011 <sup>c</sup>  | 0.13 (0.03-0.38)        | .8381               | 1.11 (0.43-3.10)        | .1203              | .0123 <sup>c</sup>  | 0.30 (0.11-0.741)       | .0317 <sup>c</sup>  | 0.41 (0.18-0.907)       |                   |  |
| Total ischemic volume <sup>b</sup> | .5354              | .0804               | 0.31 (0.07-1.03)        | .0002 <sup>c</sup>  | 2.21 (1.49-3.44)        | .2083              | .0795               | 0.42 (0.15-1.069)       | .104                | 1.20 (0.97-1.516)       |                   |  |
|                                    | <b>P Value</b>     | <b>P Value</b>      | <b>Coefficient (SE)</b> | <b>P Value</b>      | <b>Coefficient (SE)</b> | <b>P Value</b>     | <b>P Value</b>      | <b>Coefficient (SE)</b> | <b>P Value</b>      | <b>Coefficient (SE)</b> |                   |  |
| <b>Final infarct</b>               |                    |                     |                         |                     |                         |                    |                     |                         |                     |                         |                   |  |
| Age (yr)                           | .4954              | <.0001 <sup>c</sup> | -1.193 (0.279)          | .5418               | -0.006 (0.009)          | .0059 <sup>c</sup> | .0004 <sup>c</sup>  | -1.936 (0.532)          | .2641               | -0.013 (0.012)          |                   |  |
| Sex (I = F, 0 = M)                 | .5                 | <.0001 <sup>c</sup> | -1.129 (0.282)          | .3424               | -0.253 (0.266)          | .0149 <sup>c</sup> | .0005 <sup>c</sup>  | -1.891 (0.530)          | .2035               | -0.417 (0.327)          |                   |  |
| CBS >6 (I = Y, 0 = N)              | .777               | .0005 <sup>c</sup>  | -0.988 (0.277)          | .0028 <sup>c</sup>  | -0.828 (0.272)          | .0276 <sup>c</sup> | .0026 <sup>c</sup>  | -1.605 (0.526)          | .0021 <sup>c</sup>  | -1.005 (0.322)          |                   |  |
| Clot location (proximal vs distal) | .5474              | .0001 <sup>c</sup>  | -1.082 (0.273)          | .0052 <sup>c</sup>  | 0.733 (0.259)           | .0139 <sup>c</sup> | .0006 <sup>c</sup>  | -1.845 (0.527)          | .0611               | 0.640 (0.339)           |                   |  |
| Time to scan (min) <sup>b</sup>    | .4649              | <.0001 <sup>c</sup> | -1.186 (0.281)          | .7007               | 0.092 (0.240)           | .0178 <sup>c</sup> | .0005 <sup>c</sup>  | -1.956 (0.555)          | .6617               | -0.133 (0.304)          |                   |  |
| Mean blood pressure (mm Hg)        | .5062              | <.0001 <sup>c</sup> | -1.173 (0.279)          | .8499               | 0.001 (0.005)           | .0064 <sup>c</sup> | .0005 <sup>c</sup>  | -1.893 (0.533)          | .9879               | 0.000 (0.006)           |                   |  |
| Hyperglycemia (I = Y, 0 = N)       | .5442              | <.0001 <sup>c</sup> | -1.189 (0.279)          | .6784               | 0.134 (0.322)           | .0063 <sup>c</sup> | .0005 <sup>c</sup>  | -1.883 (0.532)          | .6762               | -0.184 (0.440)          |                   |  |
| Hypertension (I = Y, 0 = N)        | .4939              | <.0001 <sup>c</sup> | -1.170 (0.279)          | .7926               | 0.072 (0.273)           | .0075 <sup>c</sup> | .0003 <sup>c</sup>  | -1.934 (0.530)          | .155                | -0.476 (0.333)          |                   |  |
| Diabetes (I = Y, 0 = N)            | .4969              | <.0001 <sup>c</sup> | -1.206 (0.278)          | .2792               | 0.361 (0.332)           | .0069 <sup>c</sup> | .0005 <sup>c</sup>  | -1.895 (0.532)          | .8336               | 0.097 (0.463)           |                   |  |
| High cholesterol (I = Y, 0 = N)    | .4991              | <.0001 <sup>c</sup> | -1.178 (0.278)          | .73                 | 0.097 (0.279)           | .0058 <sup>c</sup> | .0005 <sup>c</sup>  | -1.881 (0.532)          | .4746               | -0.237 (0.330)          |                   |  |
| CAD (I = Y, 0 = N)                 | .5048              | <.0001 <sup>c</sup> | -1.182 (0.278)          | .5834               | 0.174 (0.316)           | .0083 <sup>c</sup> | .0004 <sup>c</sup>  | -1.920 (0.532)          | .3594               | 0.343 (0.373)           |                   |  |
| Smoking (I = Y, 0 = N)             | .4949              | <.0001 <sup>c</sup> | -1.177 (0.278)          | .9008               | 0.040 (0.324)           | .0043 <sup>c</sup> | .0003 <sup>c</sup>  | -1.940 (0.531)          | .2146               | -0.557 (0.447)          |                   |  |

**Note:**—CAD indicates coronary artery disease; Y, yes; N, no; Recan+, recanalization-positive; Recan-, recanalization-negative; SE, standard error; pos., positive; neg., negative.  
<sup>a</sup> Significance is  $P < .0125$ .  
<sup>b</sup> Natural log-transformation was applied for normalizing the distribution.  
<sup>c</sup> P value is significant

**On-line Table 3: Multivariate analysis and model comparison<sup>a</sup>**

|                                                                                            | Recan-      |        |                  |                     | Recan+                                             |        |                  |                     |
|--------------------------------------------------------------------------------------------|-------------|--------|------------------|---------------------|----------------------------------------------------|--------|------------------|---------------------|
|                                                                                            | Coefficient | SE     | OR (95% CI)      | P Value             | Coefficient                                        | SE     | OR (95% CI)      | P Value             |
| Baseline NIHSS <sup>b</sup>                                                                |             |        |                  |                     |                                                    |        |                  |                     |
| M1: with collateral: R <sup>2</sup> = 27.5%, SSE = 49.71, MSE = 0.30                       |             |        |                  |                     | R <sup>2</sup> = 23.0%, SSE = 83.62, MSE = 0.40    |        |                  |                     |
| tPA vs non-tPA                                                                             | 0.1983      | 0.087  | —                | .024 <sup>§</sup>   | 0.3224                                             | 0.1033 | —                | .0021 <sup>§</sup>  |
| Collateral pos. vs neg.                                                                    | -0.4605     | 0.0932 | —                | <.0001 <sup>§</sup> | -0.4357                                            | 0.1421 | —                | .0025 <sup>§</sup>  |
| Age (yr)                                                                                   | —           | —      | —                | —                   | 0.0092                                             | 0.0033 | —                | .0051 <sup>§</sup>  |
| CBS >6 (I = Y, 0 = N)                                                                      | -0.3158     | 0.0918 | —                | .0007 <sup>§</sup>  | -0.4414                                            | 0.0899 | —                | <.0001 <sup>§</sup> |
| High cholesterol (I = Y, 0 = N)                                                            | 0.208       | 0.0879 | —                | .0192 <sup>§</sup>  | —                                                  | —      | —                | —                   |
| M2: with total ischemic: R <sup>2</sup> = 33.3%, SSE = 45.93, MSE = 0.29                   |             |        |                  |                     | R <sup>2</sup> = 22.5%, SSE = 82.89, MSE = 0.40    |        |                  |                     |
| tPA vs non-tPA                                                                             | 0.1824      | 0.0853 | —                | .002 <sup>§</sup>   | 0.2966                                             | 0.105  | —                | .0052 <sup>§</sup>  |
| Age (yr)                                                                                   | —           | —      | —                | —                   | 0.0106                                             | 0.0033 | —                | .0013 <sup>§</sup>  |
| CBS >6 (I = Y, 0 = N)                                                                      | -0.0554     | 0.1054 | —                | <.0001 <sup>§</sup> | -0.437                                             | 0.0924 | —                | <.0001 <sup>§</sup> |
| High cholesterol (I = Y, 0 = N)                                                            | 0.2391      | 0.0868 | —                | .0453 <sup>§</sup>  | —                                                  | —      | —                | —                   |
| Total ischemic <sup>c</sup>                                                                | 0.2876      | 0.0453 | —                | <.0001 <sup>§</sup> | 0.0922                                             | 0.0324 | —                | .0048 <sup>§</sup>  |
| M3: with collateral and total ischemic: R <sup>2</sup> = 36.5%, SSE = 43.31, MSE = 0.27    |             |        |                  |                     | R <sup>2</sup> = 24.5%, SSE = 80.74, MSE = 0.39    |        |                  |                     |
| tPA vs non-tPA                                                                             | 0.1803      | 0.084  | —                | .0024 <sup>§</sup>  | 0.3216                                             | 0.1045 | —                | .0024 <sup>§</sup>  |
| Collateral pos. vs neg.                                                                    | -0.2863     | 0.0973 | —                | <.0001 <sup>§</sup> | -0.3508                                            | 0.1502 | —                | .0205 <sup>§</sup>  |
| Age (yr)                                                                                   | —           | —      | —                | —                   | 0.0093                                             | 0.0033 | —                | .0048 <sup>§</sup>  |
| CBS >6 (I = Y, 0 = N)                                                                      | -0.063      | 0.1038 | —                | .0002 <sup>§</sup>  | -0.3958                                            | 0.0931 | —                | <.0001 <sup>§</sup> |
| High cholesterol (I = Y, 0 = N)                                                            | 0.2432      | 0.0857 | —                | .0175 <sup>§</sup>  | —                                                  | —      | —                | —                   |
| Total ischemic <sup>c</sup>                                                                | 0.2306      | 0.0483 | —                | <.0001 <sup>§</sup> | 0.0782                                             | 0.0326 | —                | .0173 <sup>§</sup>  |
| Hemorrhagic transformation <sup>d</sup>                                                    |             |        |                  |                     |                                                    |        |                  |                     |
| M1: with collateral: R <sup>2</sup> = 5.7%, -2 log-likelihood = 222.42                     |             |        |                  |                     | R <sup>2</sup> = 11.2%, -2 log-likelihood = 267.44 |        |                  |                     |
| tPA vs non-tPA                                                                             | 0.3423      | 0.3276 | 1.41 (0.74–2.69) | .2961               | 0.358                                              | 0.3602 | 1.43 (0.71–2.95) | .3202               |
| Collateral pos. vs neg.                                                                    | -0.3743     | 0.3463 | 0.69 (0.35–1.34) | .2798               | -1.0343                                            | 0.472  | 0.36 (0.14–0.88) | .0284 <sup>§</sup>  |
| CBS >6 (I = Y, 0 = N)                                                                      | -0.7706     | 0.3446 | 0.46 (0.23–0.90) | .0253 <sup>§</sup>  | —                                                  | —      | —                | —                   |
| Clot location (proximal vs distal)                                                         | —           | —      | —                | —                   | 0.3996                                             | 0.1557 | 2.22 (1.21–4.12) | .0102 <sup>§</sup>  |
| Hyperglycemia (I = Y, 0 = N)                                                               | —           | —      | —                | —                   | 1.1226                                             | 0.3884 | 3.07 (1.45–6.70) | .0039 <sup>§</sup>  |
| mRS >2 <sup>e</sup>                                                                        |             |        |                  |                     |                                                    |        |                  |                     |
| M1: with collateral: R <sup>2</sup> = 19.2%, -2 log-likelihood = 144.66                    |             |        |                  |                     | R <sup>2</sup> = 11.9%, -2 log-likelihood = 267.17 |        |                  |                     |
| tPA vs non-tPA                                                                             | 0.4121      | 0.4189 | 1.51 (0.66–3.45) | .3253               | 0.5162                                             | 0.3526 | 1.68 (0.85–3.39) | .1432               |
| Collateral pos. vs neg.                                                                    | -1.8696     | 0.6442 | 0.15 (0.04–0.48) | .0037 <sup>§</sup>  | -0.8809                                            | 0.5085 | 0.41 (0.14–1.08) | .0832               |
| Age (yr)                                                                                   | 0.0414      | 0.0146 | 1.04 (1.01–1.07) | .0046 <sup>§</sup>  | 0.0486                                             | 0.0116 | 1.05 (1.03–1.08) | <.0001 <sup>§</sup> |
| Clot location (proximal vs distal)                                                         | 0.632       | 0.2151 | 3.54 (1.56–8.50) | .0033 <sup>§</sup>  | —                                                  | —      | —                | —                   |
| M2: with total ischemic: R <sup>2</sup> = 22.4%, -2 log-likelihood = 137.06                |             |        |                  |                     | R <sup>2</sup> = 12.7%, -2 log-likelihood = 265.05 |        |                  |                     |
| tPA vs non-tPA                                                                             | 0.3106      | 0.4443 | 1.36 (0.56–3.26) | .4845               | 0.446                                              | 0.3512 | 1.56 (0.79–3.14) | .2041               |
| Age (yr)                                                                                   | 0.0433      | 0.0153 | 1.04 (1.02–1.08) | .0047 <sup>§</sup>  | 0.0514                                             | 0.0117 | 1.05 (1.03–1.08) | <.0001 <sup>§</sup> |
| Clot location (proximal vs distal)                                                         | 0.3188      | 0.2349 | 1.89 (0.75–4.82) | .1748               | —                                                  | —      | —                | —                   |
| Total ischemic <sup>c</sup>                                                                | 0.8811      | 0.2315 | 2.41 (1.57–3.91) | .0001 <sup>§</sup>  | 0.252                                              | 0.1159 | 1.29 (1.04–1.64) | .0296 <sup>§</sup>  |
| M3: with collateral and total ischemic: R <sup>2</sup> = 24.1%, -2 log-likelihood = 132.82 |             |        |                  |                     | R <sup>2</sup> = 13.4%, -2 log-likelihood = 263.44 |        |                  |                     |
| tPA vs non-tPA                                                                             | 0.2558      | 0.4482 | 1.29 (0.53–3.11) | .5683               | 0.4889                                             | 0.3557 | 1.63 (0.82–3.31) | .1693               |
| Collateral pos. vs neg.                                                                    | -1.183      | 0.6882 | 0.31 (0.07–1.06) | .0856               | -0.651                                             | 0.5242 | 0.52 (0.18–4.41) | .2142               |
| Age (yr)                                                                                   | 0.042       | 0.0153 | 1.04 (1.01–1.08) | .0059 <sup>§</sup>  | 0.0498                                             | 0.0117 | 1.05 (1.03–1.08) | <.0001 <sup>§</sup> |
| Clot location (proximal vs distal)                                                         | 0.3397      | 0.2396 | 1.97 (0.77–5.14) | .1562               | —                                                  | —      | —                | —                   |
| Total ischemic <sup>c</sup>                                                                | 0.707       | 0.2444 | 2.03 (1.29–3.38) | .0038 <sup>§</sup>  | 0.2153                                             | 0.1174 | 1.24 (0.99–1.58) | .0666               |
| Final infarct <sup>f</sup>                                                                 |             |        |                  |                     |                                                    |        |                  |                     |
| M1: with collateral: R <sup>2</sup> = 16.5%, SSE = 353.55, MSE = 2.42                      |             |        |                  |                     | R <sup>2</sup> = 14.7%, SSE = 745.47, MSE = 4.31   |        |                  |                     |
| tPA vs non-tPA                                                                             | 0.0739      | 0.2605 | —                | .777                | 0.8317                                             | 0.3743 | —                | .0276 <sup>§</sup>  |
| Collateral pos. vs neg.                                                                    | -0.9885     | 0.2766 | —                | .0005 <sup>§</sup>  | -1.6049                                            | 0.5259 | —                | .0026 <sup>§</sup>  |
| CBS >6 (I = Y, 0 = N)                                                                      | -0.8281     | 0.272  | —                | .0028 <sup>§</sup>  | -1.0048                                            | 0.3218 | —                | .0021 <sup>§</sup>  |
| M2: with total ischemic: R <sup>2</sup> = 26.6%, SSE = 313.52, MSE = 2.13                  |             |        |                  |                     | R <sup>2</sup> = 13.5%, SSE = 755.11, MSE = 4.39   |        |                  |                     |
| tPA vs non-tPA                                                                             | 0.1159      | 0.2436 | —                | .635                | 0.6994                                             | 0.3759 | —                | .0645               |
| CBS >6 (I = Y, 0 = N)                                                                      | -0.0796     | 0.2946 | —                | .7875               | -0.9503                                            | 0.3317 | —                | .0047 <sup>§</sup>  |
| Total ischemic <sup>c</sup>                                                                | 0.7739      | 0.1306 | —                | <.0001 <sup>§</sup> | 0.3042                                             | 0.1153 | —                | .0091 <sup>§</sup>  |
| M3: with collateral and total ischemic: R <sup>2</sup> = 28.0%, SSE = 304.37, MSE = 2.11   |             |        |                  |                     | R <sup>2</sup> = 16.9%, SSE = 725.22, MSE = 4.24   |        |                  |                     |
| tPA vs non-tPA                                                                             | 0.0881      | 0.2438 | —                | .7185               | 0.8063                                             | 0.3716 | —                | .0314 <sup>§</sup>  |
| Collateral pos. vs neg.                                                                    | -0.4945     | 0.2798 | —                | .0793               | -1.4074                                            | 0.5301 | —                | .0087 <sup>§</sup>  |
| CBS >6 (I = Y, 0 = N)                                                                      | -0.1096     | 0.2946 | —                | .7105               | -0.8366                                            | 0.3288 | —                | .0118 <sup>§</sup>  |
| Total ischemic <sup>c</sup>                                                                | 0.6743      | 0.1409 | —                | <.0001 <sup>§</sup> | 0.251                                              | 0.1151 | —                | .0305 <sup>§</sup>  |

**Note:**—SSE indicates sum of squared errors; MSE, mean squared error; Recan+, recanalization-positive; Recan-, recanalization-negative; SE, standard error; pos., positive; neg., negative; Y, yes; N, no; —, not applicable.

<sup>a</sup> F = (Drop in SSE/Number of Extra Variables) / s<sup>2</sup> for full model, where SSE was the sum of squared errors and s<sup>2</sup> was the mean squared error. For bleed and poor outcome binary variables, the likelihood ratio test statistic was determined by -2 log-likelihood for the null model (M1 or M2 and the +2 log-likelihood for the alternative model [M3] under  $\chi^2$  distribution. Degrees of freedom equal the difference between the number of parameters of the alternative model and the null model. For baseline NIHSS and final infarct outcomes, we used the F-test for comparing nested models of M3 vs M2 and M3 vs M1.

<sup>b</sup> Model comparisons based on F-test: Recan-: M3 vs M1: P = .0019; M3 vs M2: P = .0141; Recan+: M3 vs M1: P = .0250; M3 vs M2: P = .0447.

<sup>c</sup> Natural log-transformation was applied for normalizing distribution; P < .05 was considered significantly different.

<sup>d</sup> Model comparisons based on F-test: Recan-: M3 vs M1: P = .0585; M3 vs M2: P = .0759; Recan+: M3 vs M1: P = .6468; M3 vs M2: P = .0393 (On-line Table 4).

<sup>e</sup> Model comparisons based on F-test: Recan-: M3 vs M1: P = .0006; M3 vs M2: P = .0395; Recan+: M3 vs M1: P = .0534; M3 vs M2: P = .2045.

<sup>f</sup> Model comparisons based on F-test: Recan-: M3 vs M1: P = .0054; M3 vs M2: P = .0950; Recan+: M3 vs M1: P = .0824; M3 vs M2: P = .0448.

<sup>§</sup> Indicates a significant P value.

**On-line Table 4: Models 2 and 3 from multivariate analysis for HT**

|                                                                                       | Recan-      |        |                  |                   | Recan+                                      |        |                  |                    |
|---------------------------------------------------------------------------------------|-------------|--------|------------------|-------------------|---------------------------------------------|--------|------------------|--------------------|
|                                                                                       | Coefficient | SE     | OR (95% CI)      | P Value           | Coefficient                                 | SE     | OR (95% CI)      | P Value            |
| Hemorrhagic transformation <sup>a</sup>                                               |             |        |                  |                   |                                             |        |                  |                    |
| M2: with total ischemic: $R^2 = 7.3\%$ ,<br>-2 log-likelihood = 221.99                |             |        |                  |                   | $R^2 = 9.5\%$ , -2 log-likelihood = 271.48  |        |                  |                    |
| tPA vs non-tPA                                                                        | 0.3213      | 0.3303 | 1.38 (0.72–2.65) | .3307             | 0.2647                                      | 0.3515 | 1.30 (0.66–2.63) | .04513             |
| CBS >6 (1 = Y, 0 = N)                                                                 | -0.407      | 0.3992 | 0.67 (0.30–1.45) | .3079             | –                                           | –      | –                | –                  |
| Clot location (proximal vs distal)                                                    | –           | –      | –                | –                 | 0.3968                                      | 0.1562 | 2.21 (1.20–4.11) | .0111 <sup>c</sup> |
| Hyperglycemia (1 = Y, 0 = N)                                                          | –           | –      | –                | –                 | 1.1007                                      | 0.3839 | 3.01 (1.43–6.50) | .0041 <sup>c</sup> |
| Total ischemic volume <sup>b</sup>                                                    | 0.3809      | 0.1926 | 1.63 (1.20–2.29) | .048 <sup>c</sup> | 0.1051                                      | 0.1099 | 1.11 (0.90–1.40) | .3388              |
| M3: with collateral and total<br>ischemic: $R^2 = 7.7\%$ , -2 log-likelihood = 218.84 |             |        |                  |                   | $R^2 = 11.3\%$ , -2 log-likelihood = 267.23 |        |                  |                    |
| tPA vs non-tPA                                                                        | 0.3692      | 0.3324 | 1.51 (0.80–2.90) | .2667             | 0.3483                                      | 0.3607 | 1.42 (0.71–2.92) | .3343              |
| Collateral pos. vs neg.                                                               | -0.0875     | 0.3783 | 0.92 (0.44–1.94) | .8173             | -0.9825                                     | 0.4852 | 0.37 (0.14–0.95) | .0429 <sup>c</sup> |
| CBS >6 (1 = Y, 0 = N)                                                                 | -0.3783     | 0.4007 | 0.67 (0.30–1.45) | .3451             | –                                           | –      | –                | –                  |
| Clot location (proximal vs distal)                                                    | –           | –      | –                | –                 | 0.3901                                      | 0.1572 | 2.18 (1.18–4.07) | .0131 <sup>c</sup> |
| Hyperglycemia (1 = Y, 0 = N)                                                          | –           | –      | –                | –                 | 1.1184                                      | 0.3886 | 3.06 (1.44–6.68) | .004 <sup>c</sup>  |
| Total ischemic volume <sup>a</sup>                                                    | 0.3848      | 0.2115 | 1.62 (1.15–2.38) | .0688             | 0.0504                                      | 0.1107 | 1.05 (0.85–1.32) | .6491              |

**Note:**— indicates not applicable; Recan+, recanalization-positive; Recan-, recanalization-negative; SE, standard error; pos., positive; neg., negative; Y, yes; N, no.

<sup>a</sup> For baseline NIHSS and final infarct outcomes, we used the *F*-test for comparing nested models of M3 vs M2 and M3 vs M1. Model comparisons based on log-likelihood ratio test: Recan-: M3 vs M1:  $P = .0585$ ; M3 vs M2:  $P = .0759$ ; Recan+: M3 vs M1:  $P = .6468$ ; M3 vs M2:  $P = .0393$ .<sup>c</sup>

<sup>b</sup> Natural log-transformation was applied for normalizing distribution;  $P < .05$  was considered significantly different.

<sup>c</sup> *P* value is significant.
